# Supplementary material
Source: PubMed Central journal article supplement (PMC8235614)

## Supplementary Materials for

### **Opiates increase the number of hypocretin-producing cells in human and mouse brain and reverse cataplexy in a mouse model of narcolepsy**

Thomas C. Thannickal, Joshi John, Ling Shan, Dick F. Swaab, Ming-Fung Wu,  
Lalini Ramanathan, Ronald McGregor, Keng-Tee Chew, Marcia Cornford,  
Akihiro Yamanaka, Ayumu Inutsuka, Rolf Fronczek, Gert Jan Lammers, Paul F. Worley,  
Jerome M. Siegel\*

\*Corresponding author. Email: jsiegel@ucla.edu

Published 27 June 2018, *Sci. Transl. Med.* **10**, eaao4953 (2018)  
DOI: 10.1126/scitranslmed.aao4953

#### **This PDF file includes:**

Fig. S1. Western blots for Fig. 3 (D and E).

Table S1. Characteristics of animals used for morphine study.

Fig. S1. Western blots for Fig. 3 (D and E).

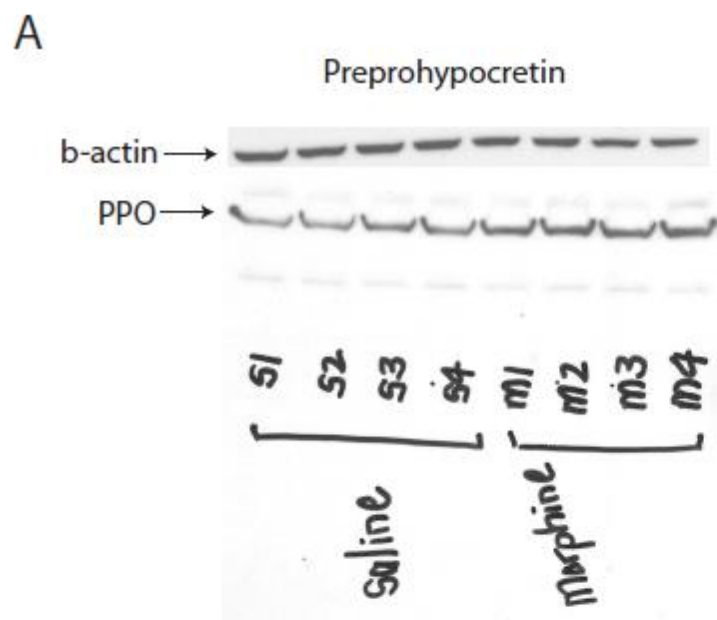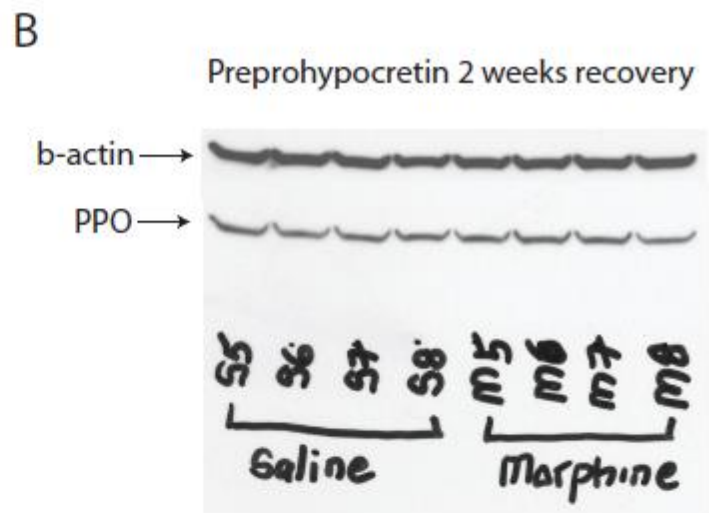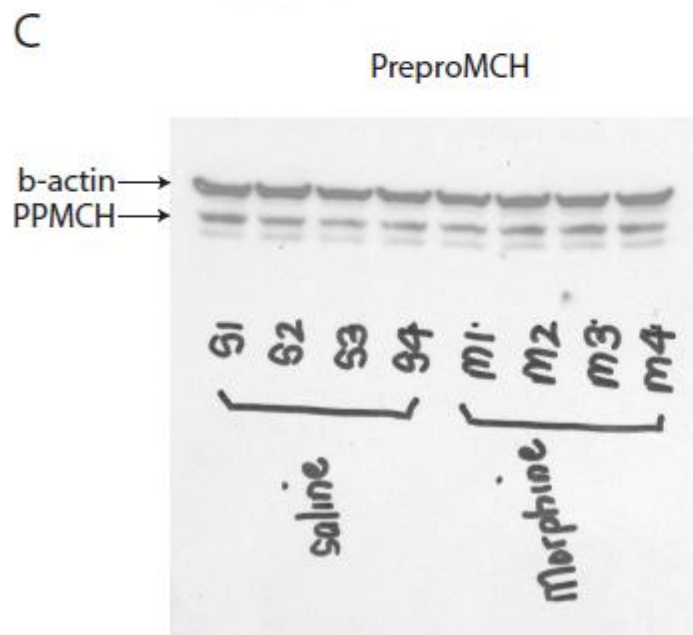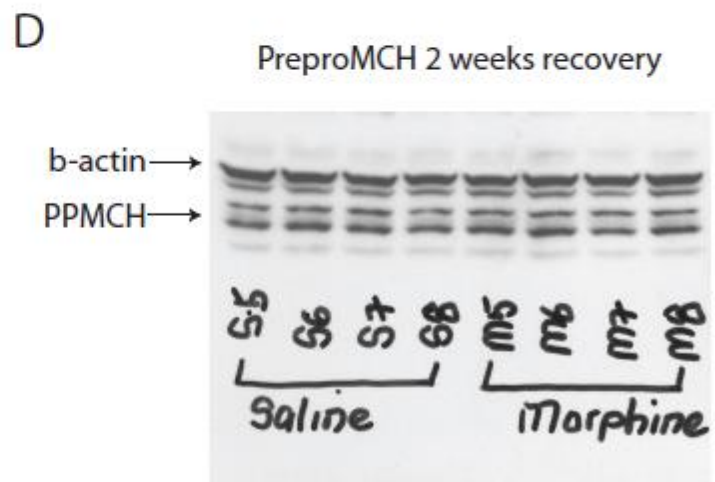

Supplement: NIHMS1712025-supplement-supplementary_material.pdf [file NIHMS1712025-supplement-supplementary_material.pdf]
